# Supplementary material
Source: PubMed Central journal article supplement (PMC6459215)
Supplement: jamaoncol-5-529-s001.pdf [file jamaoncol-5-529-s001.pdf]

## Supplementary Online Content

Wallis CJD, Butaney M, Satkunasivam R, et al. Association of patient sex with efficacy of immune checkpoint inhibitors and overall survival in advanced cancers. *JAMA Oncol*. Published online January 3, 2019. doi:10.1001/jamaoncol.2018.5904

### **eTable.** Risk of Bias

This supplementary material has been provided by the authors to give readers additional information about their work.

**eTable. Risk of Bias**

|                                | <b>Random Sequence Generation (selection bias)</b> | <b>Allocation concealment (selection bias)</b> | <b>Blinding of participants and personnel (performance bias)</b> | <b>Blinding of outcome assessment (detection bias)</b> | <b>Incomplete outcome data (attrition bias)</b> | <b>Selective reporting (reporting bias)</b> |
|--------------------------------|----------------------------------------------------|------------------------------------------------|------------------------------------------------------------------|--------------------------------------------------------|-------------------------------------------------|---------------------------------------------|
| Antonia et al. <sup>34</sup>   | Low Risk                                           | Low Risk                                       | Low Risk                                                         | Low Risk                                               | Low Risk                                        | Low Risk                                    |
| Barlesi et al. <sup>36</sup>   | Low Risk                                           | At Risk                                        | At Risk                                                          | At Risk                                                | Low Risk                                        | Low Risk                                    |
| Bellmunt et al. <sup>15</sup>  | Low Risk                                           | At Risk                                        | At Risk                                                          | At Risk                                                | At Risk                                         | Low Risk                                    |
| Borghaei et al. <sup>16</sup>  | Low Risk                                           | At Risk                                        | At Risk                                                          | At Risk                                                | Low Risk                                        | Low Risk                                    |
| Brahmer et al. <sup>17</sup>   | Low Risk                                           | At Risk                                        | At Risk                                                          | At Risk                                                | Low Risk                                        | Low Risk                                    |
| Carbone et al. <sup>18</sup>   | Low Risk                                           | At Risk                                        | At Risk                                                          | Low Risk                                               | Low Risk                                        | Low Risk                                    |
| Ferris et al. <sup>19</sup>    | Low Risk                                           | At Risk                                        | At Risk                                                          | At Risk                                                | Low Risk                                        | Low Risk                                    |
| Gandhi et al. <sup>20</sup>    | Low Risk                                           | Low Risk                                       | Low Risk                                                         | Low Risk                                               | Low Risk                                        | Low Risk                                    |
| Govindan et al. <sup>21</sup>  | Low Risk                                           | At Risk                                        | Low Risk                                                         | Low Risk                                               | Low Risk                                        | Low Risk                                    |
| Herbst et al. <sup>22</sup>    | Low Risk                                           | Low Risk                                       | At Risk                                                          | At Risk                                                | Low Risk                                        | Low Risk                                    |
| Horn et al. <sup>37</sup>      | Low Risk                                           | Low Risk                                       | Low Risk                                                         | Low Risk                                               | Low Risk                                        | Low Risk                                    |
| Kang et al. <sup>23</sup>      | Low Risk                                           | Low Risk                                       | Low Risk                                                         | Low Risk                                               | Low Risk                                        | Low Risk                                    |
| Larkin et al. <sup>24</sup>    | Low Risk                                           | At Risk                                        | At Risk                                                          | At Risk                                                | Low Risk                                        | Low Risk                                    |
| Maio et al. <sup>25</sup>      | Low Risk                                           | Low Risk                                       | Low Risk                                                         | Low Risk                                               | Low Risk                                        | Low Risk                                    |
| Motzer et al. <sup>26</sup>    | Low Risk                                           | At Risk                                        | At Risk                                                          | At Risk                                                | Low Risk                                        | Low Risk                                    |
| Motzer et al. <sup>27</sup>    | Low Risk                                           | At Risk                                        | At Risk                                                          | At Risk                                                | Low Risk                                        | Low Risk                                    |
| Paz-Ares et al. <sup>35</sup>  | Low Risk                                           | Low Risk                                       | Low Risk                                                         | Low Risk                                               | Low Risk                                        | Low Risk                                    |
| Reck et al. <sup>28</sup>      | Low Risk                                           | At Risk                                        | Low Risk                                                         | Low Risk                                               | Low Risk                                        | Low Risk                                    |
| Reck et al. <sup>29</sup>      | Low Risk                                           | At Risk                                        | At Risk                                                          | Low Risk                                               | Low Risk                                        | Low Risk                                    |
| Ribas et al. <sup>30</sup>     | Low Risk                                           | At Risk                                        | At Risk                                                          | At Risk                                                | Low Risk                                        | Low Risk                                    |
| Rittmeyer et al. <sup>31</sup> | Low Risk                                           | At Risk                                        | At Risk                                                          | At Risk                                                | Low Risk                                        | Low Risk                                    |

|                             |          |         |          |          |          |          |
|-----------------------------|----------|---------|----------|----------|----------|----------|
| Robert et al. <sup>32</sup> | Low Risk | At Risk | Low Risk | Low Risk | Low Risk | Low Risk |
| Robert et al. <sup>33</sup> | Low Risk | At Risk | Low Risk | Low Risk | Low Risk | Low Risk |
